# Supplementary material for: High Leaf Vein Density Promotes Leaf Gas Exchange by Enhancing Leaf Hydraulic Conductance in Oryza sativa L. Plants
Source: Frontiers journal article supplement (doi:10.3389/fpls.2021.693815), 2021-10-25
Supplement: Data_Sheet_1.pdf [file Data_Sheet_1.pdf]

Supplementary Table 1. The vapor pressure deficit between leaf and air ( $VPD_{\text{leaf-air}}$ ) of the six rice genotypes. Data are shown as the means  $\pm$  SD of three replicates. \* indicates significance at the 0.05 levels. Within the column, different letters represent data that are significantly different from each other in the LSD (0.05).

| Genotype       | $VPD_{\text{leaf-air}}$ (MPa) |
|----------------|-------------------------------|
| CHAMPA         | $1.39 \pm 0.05$ bc            |
| Huayou 675     | $1.26 \pm 0.05$ c             |
| Teqin          | $1.74 \pm 0.27$ a             |
| Huanghuazhan   | $1.57 \pm 0.13$ ab            |
| Kirmizi Celtik | $1.70 \pm 0.19$ a             |
| N22            | $1.69 \pm 0.12$ a             |
| ANOVA          |                               |
| Average        | 1.56                          |
| Genotype       | *                             |

Supplementary Table 2. The  $CO_2$  compensation point in chloroplasts without day respiration ( $\Gamma^*$ ) and the day respiration rate ( $R_d$ ) of the six rice genotypes. Data are shown as the means  $\pm$  SD of three replicates. \*\*\* indicates significance at the 0.001 level. Within a column, different letters represent data that are significantly different from each other in the LSD (0.05).

| Genotype       | $\Gamma^*$ ( $\mu\text{mol mol}^{-1}$ ) | $R_d$ ( $\mu\text{mol m}^{-2} \text{s}^{-1}$ ) |
|----------------|-----------------------------------------|------------------------------------------------|
| CHAMPA         | $44.08 \pm 0.17$ c                      | $0.395 \pm 0.053$ bc                           |
| Huayou 675     | $41.72 \pm 0.16$ d                      | $0.306 \pm 0.028$ c                            |
| Teqin          | $46.00 \pm 0.24$ b                      | $0.533 \pm 0.142$ b                            |
| Huanghuazhan   | $42.51 \pm 0.07$ d                      | $0.277 \pm 0.163$ c                            |
| Kirmizi Celtik | $44.10 \pm 0.23$ c                      | $0.441 \pm 0.059$ bc                           |
| N22            | $51.59 \pm 1.25$ a                      | $1.350 \pm 0.003$ a                            |
| ANOVA          |                                         |                                                |
| Average        | 45.00                                   | 0.551                                          |
| Genotype       | ***                                     | ***                                            |
